# Supplementary material for: Diversified local CRISPR-Cas immunity to viruses of Sulfolobus islandicus
Source: PubMed Central journal article supplement (PMC6452263; doi:10.1098/rstb.2018.0093), 2019-03-25
Supplement: rstb20180093supp1.pdf [file rstb20180093supp1.pdf]

1 **Diversified local CRISPR-Cas immunity to viruses of *Sulfolobus islandicus***

2

3 **Authors**

4 Matthew D. Pauly<sup>1</sup>, Maria A. Bautista<sup>1,2</sup>, Jesse A. Black<sup>1</sup>, and Rachel J. Whitaker<sup>1,3, \*</sup>

5 <sup>1</sup>Department of Microbiology, University of Illinois at Urbana-Champaign, 601 S. Goodwin Ave., Urbana,  
6 IL 61801, USA.

7 <sup>2</sup> Current address: Department of Biological Sciences, University of Calgary, 2500 University Dr. NW.,  
8 Calgary, AB T2R 1K8, Canada.

9 <sup>3</sup>Carl R. Woese Institute for Genomic Biology, University of Illinois at Urbana-Champaign, 1206 W.  
10 Gregory Dr., Urbana, IL 61801, USA.

11 \* Correspondence: [rwhitaker@life.illinois.edu](mailto:rwhitaker@life.illinois.edu) ; (217) 244-8420

12

13

14

15

16

17

18

19

20 **Supplementary Information**

21

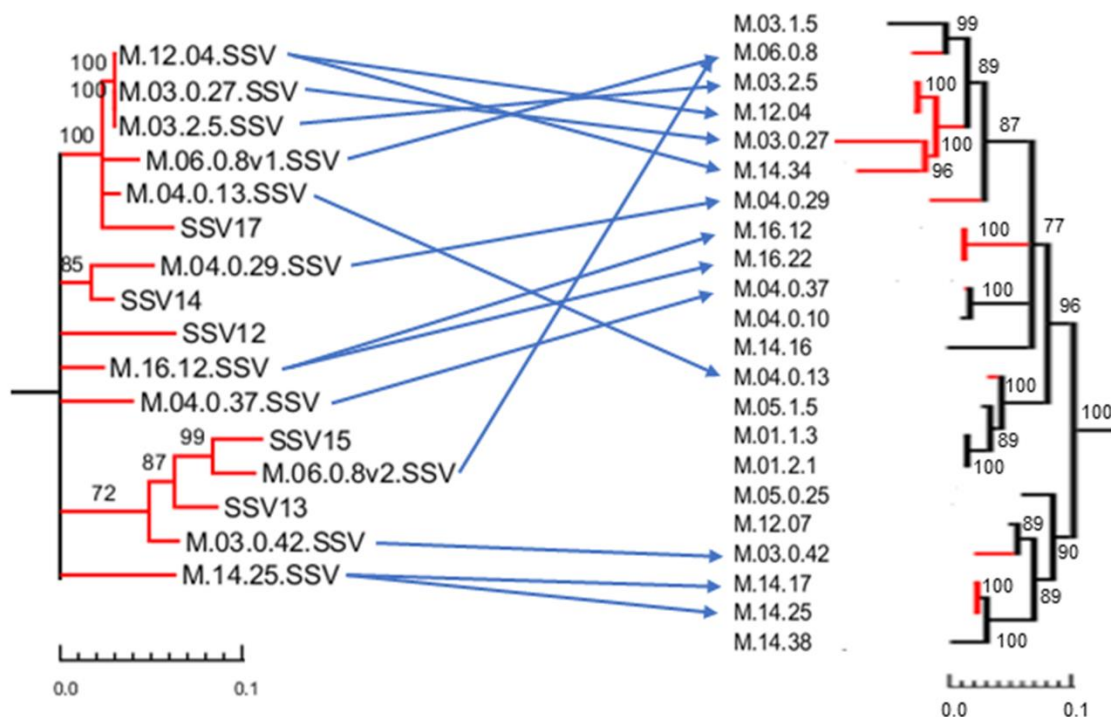

22

23 **Supplementary Figure 1. Phylogenetic comparison of Mutnovsky SSVs and Mutnovsky *S. islandicus***  
 24 **strains.**

25 Phylogenetic tree of Mutnovsky SSVs built with RAxML version 8 using concatenated, aligned nucleotide  
 26 sequences from 10 shared core genes (left). Nodes with bootstrap values less than 70% are collapsed.

27 Numbers indicate bootstrap values for the upstream node. Phylogenetic tree of all Mutnovsky *S.*

28 *islandicus* strains created using ClonalFrame v1.2 using alignments to regions of the M.16.27 genome

29 present in all strains (right). Only the portion of the phylogenetic tree containing strains with integrated

30 SSVs (red branches) is shown. Blue arrows indicate which SSVs are integrated into which strains.

31

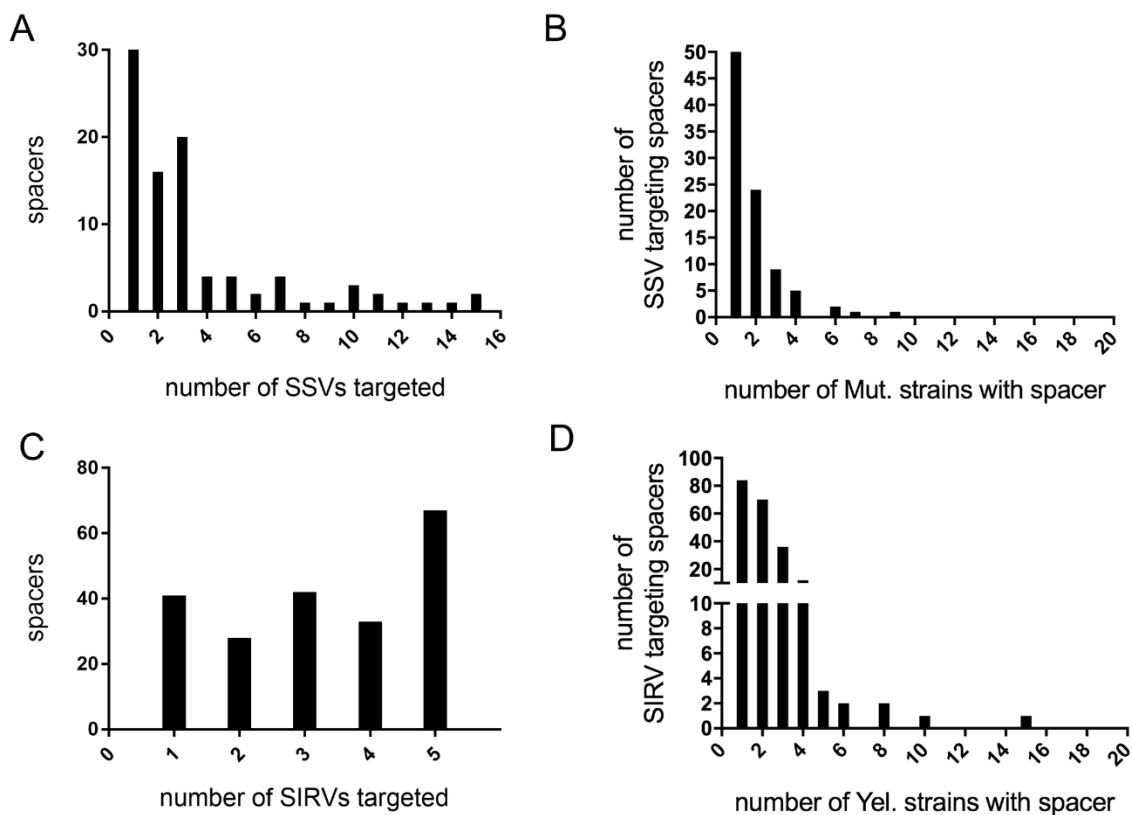

32

33 **Supplementary Figure 2. Most spacers target multiple viruses and are shared sparingly.**

34 **A.** The number of SSVs targeted by each SSV-targeting Mutnovsky spacer. **B.** The number of Mutnovsky

35 strains that share each SSV-targeting spacer. **C.** The number of SIRVs targeted by each SIRV-targeting

36 Yellowstone spacer. **D.** The number of Yellowstone strains that share each SIRV-targeting spacer.

37

38

39

40

41

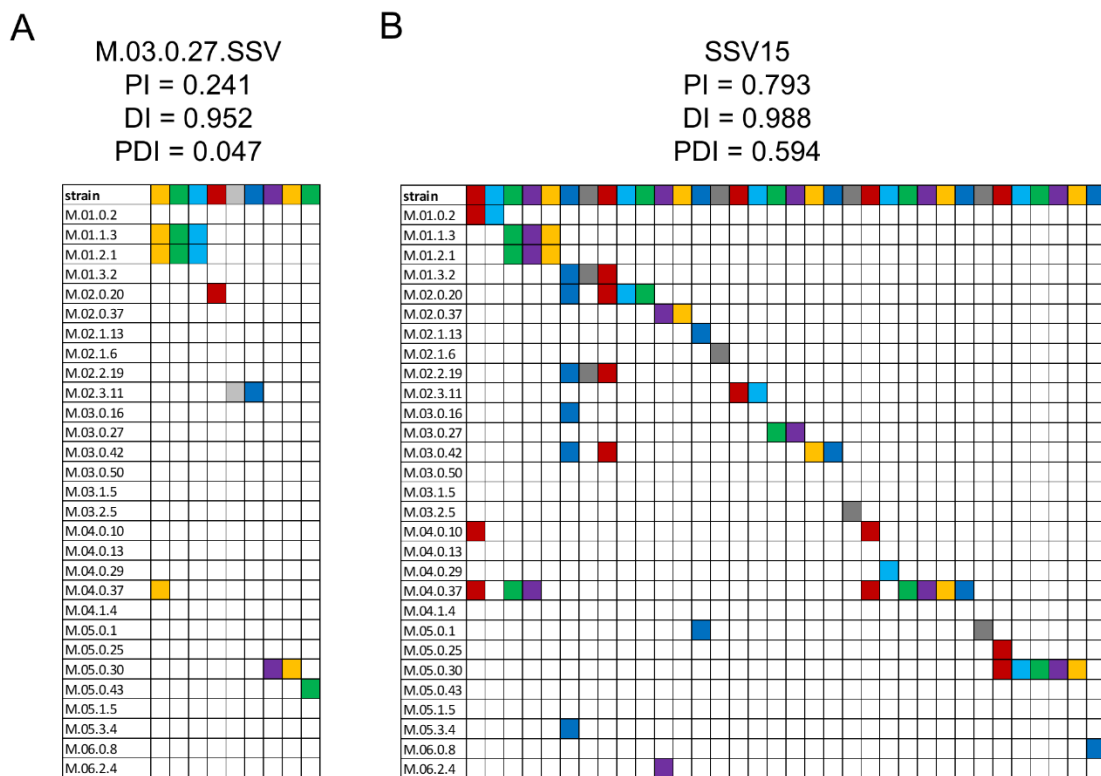

42

43 **Supplementary Figure 3. Virus-targeting spacers within a population.**

44 Diagrams representing immunity structure of the 2010 Mutnovsky population targeting M.03.0.27.SSV

45 **(A)** and SSV15 **(B)**. Each column indicates a unique spacer targeting protospacers in the virus. Colored

46 boxes indicate that a strain from the population (first column) possesses that spacer. Strains with no

47 colored boxes in their row do not target the virus. Repeated colors do not indicate relationships among

48 spacers.

49

50

51

52

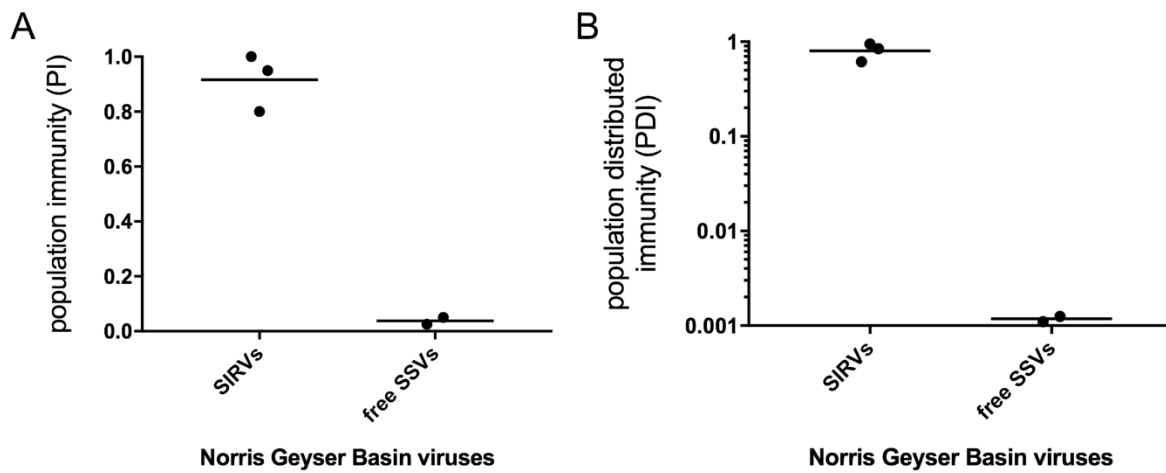

53

54 **Supplementary Figure 4. Targeting of viruses from Norris Geyser Basin.**

55 The PI (A) and PDI (B) for the Yellowstone *S. islandicus* population from the Nymph Lake area targeting  
 56 viruses isolated the Norris Geyser Basin area of Yellowstone National Park. Norris Geyser Basin SSVs  
 57 include two newly identified cell-free viruses (SSV11 and SSV18) and the SIRVs include SIRV8, SIRV9, and  
 58 SIRV10 (Bautista *et al.* 2017).

59

60

61

62

63

64

65

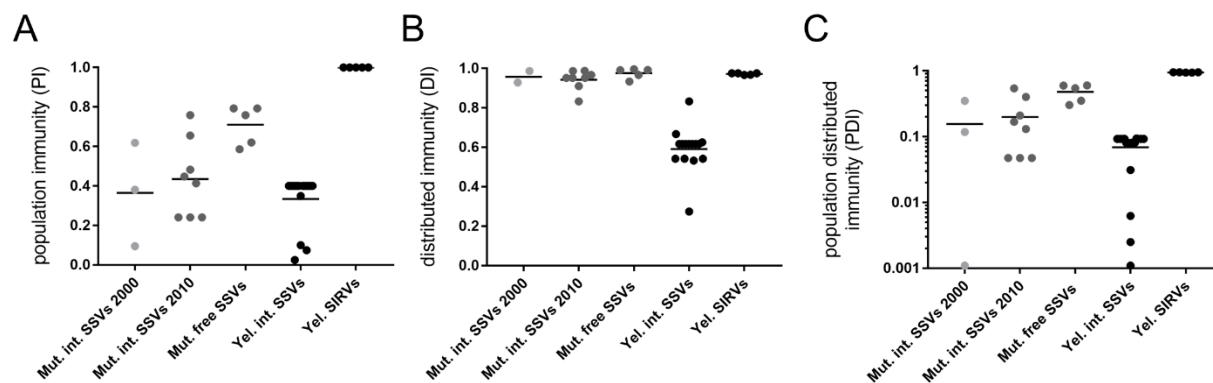

66

67 **Supplementary Figure 5. CRISPR-Cas immunity without criteria for Type III system.**

68 The PI (A), DI (B), and PDI (C) for contemporary interactions between *S. islandicus* populations (light gray  
 69 = Mutnovsky 2000, dark gray = Mutnovsky 2010, black = Yellowstone 2012) and virus groups (indicated  
 70 on x-axis). The average and values for individual viruses are shown. Immune metrics were calculated  
 71 using all spacers with 4 or fewer mismatches to a viral protospacer with no criteria for the presence of a  
 72 PAM sequence or type III CRISPR system.

73

74

75

76

77

78

79

80

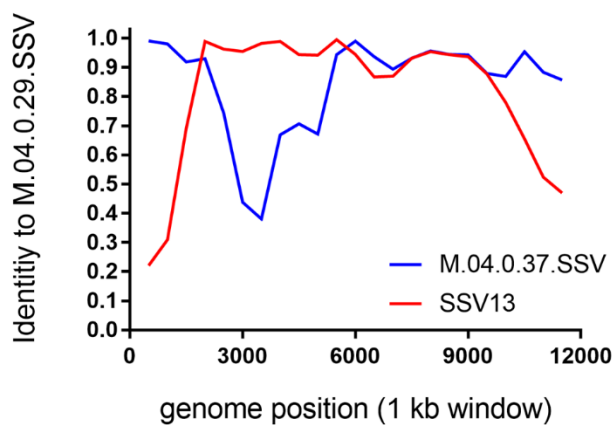

81

82 **Supplementary Figure 6. SSVs share genetic material with multiple viruses.**

83 The nucleotide identity of M.04.0.37.SSV and bases 4500-16184 of SSV13 aligned to the genome of  
84 M.04.0.29.SSV. Multisequence alignment was generated using MAFFT. Percent identities are shown for  
85 1000 bp windows with 500 bp overlaps.

86

87

88

89

90

91

92

93

94 Supplementary Table 1. Mutnovsky Population CRISPR-Cas targeting

| strain              | A1,A2 spacers | C spacers | NL spacers | Type I | Type III | spacers targeting |               |              |               |               |               |                |                |             |             |             | SSV immunity |       |       |       |       |       |
|---------------------|---------------|-----------|------------|--------|----------|-------------------|---------------|--------------|---------------|---------------|---------------|----------------|----------------|-------------|-------------|-------------|--------------|-------|-------|-------|-------|-------|
|                     |               |           |            |        |          | M.03.0.27.SSV     | M.03.0.42.SSV | M.03.2.5.SSV | M.04.0.13.SSV | M.04.0.29.SSV | M.04.0.37.SSV | M.06.0.8v1.SSV | M.06.0.8v2.SSV | M.12.04.SSV | M.14.25.SSV | M.16.12.SSV |              | SSV12 | SSV13 | SSV14 | SSV15 | SSV17 |
| <b>2010 strains</b> |               |           |            |        |          |                   |               |              |               |               |               |                |                |             |             |             |              |       |       |       |       |       |
| M.01.0.2            | 162           | 77        |            | X      | X        | 0                 | 1             | 0            | 1             | 0             | 0             | 0              | 1              | 0           | 2           | 0           | 1            | 2     | 2     | 2     | 0     | 0.50  |
| M.01.1.3            | 117           | 114       |            | X      |          | 3                 | 3             | 3            | 2             | 3             | 2             | 1              | 1              | 3           | 3           | 2           | 3            | 3     | 2     | 3     | 2     | 1.00  |
| M.01.2.1            | 216           | 146       |            | X      |          | 3                 | 3             | 3            | 2             | 3             | 2             | 1              | 1              | 3           | 3           | 2           | 3            | 3     | 2     | 3     | 2     | 1.00  |
| M.01.3.2            | 118           | 75        |            | X      |          | 0                 | 3             | 0            | 0             | 1             | 1             | 0              | 2              | 0           | 2           | 1           | 1            | 3     | 2     | 3     | 1     | 0.69  |
| M.02.0.20           | 172           | 76        |            | X      | X        | 1                 | 5             | 1            | 0             | 2             | 3             | 1              | 4              | 1           | 4           | 2           | 1            | 2     | 2     | 4     | 2     | 0.94  |
| M.02.0.37           | 104           | 97        |            | X      | X        | 0                 | 2             | 0            | 0             | 0             | 0             | 0              | 0              | 0           | 2           | 0           | 0            | 2     | 0     | 2     | 2     | 0.31  |
| M.02.1.13           | 158           | 69        |            | X      | X        | 0                 | 1             | 0            | 1             | 0             | 0             | 0              | 2              | 0           | 1           | 0           | 1            | 3     | 1     | 1     | 1     | 0.56  |
| M.02.1.6            | 122           |           |            | X      | X        | 0                 | 0             | 0            | 1             | 0             | 0             | 0              | 2              | 0           | 0           | 0           | 1            | 2     | 1     | 1     | 1     | 0.44  |
| M.02.2.19           | 117           | 85        |            | X      |          | 0                 | 3             | 0            | 0             | 1             | 1             | 0              | 2              | 0           | 1           | 1           | 1            | 2     | 2     | 3     | 1     | 0.69  |
| M.02.3.11           | 121           |           |            | X      | X        | 2                 | 1             | 2            | 1             | 2             | 2             | 2              | 2              | 2           | 0           | 2           | 1            | 1     | 1     | 2     | 1     | 0.94  |
| M.03.0.16           | 107           | 76        |            | X      |          | 0                 | 2             | 0            | 0             | 1             | 1             | 0              | 1              | 0           | 1           | 1           | 1            | 2     | 1     | 1     | 0     | 0.63  |
| M.03.0.27           | 81            |           |            | X      |          | 0                 | 0             | 0            | 1             | 0             | 0             | 0              | 0              | 0           | 0           | 0           | 0            | 0     | 0     | 2     | 0     | 0.13  |
| M.03.0.42           | 302           | 71        |            | X      | X        | 0                 | 3             | 0            | 2             | 1             | 2             | 0              | 4              | 0           | 3           | 2           | 3            | 2     | 5     | 4     | 1     | 0.75  |
| M.03.0.50           | 146           | 132       |            | X      | X        | 0                 | 0             | 0            | 0             | 0             | 0             | 0              | 0              | 0           | 2           | 0           | 0            | 0     | 0     | 0     | 1     | 0.13  |
| M.03.1.5            | 102           | 82        |            | X      |          | 0                 | 0             | 0            | 0             | 0             | 0             | 0              | 0              | 0           | 2           | 0           | 0            | 2     | 0     | 0     | 0     | 0.13  |
| M.03.2.5            | 168           |           |            | X      | X        | 0                 | 0             | 0            | 0             | 0             | 0             | 0              | 1              | 0           | 2           | 0           | 0            | 1     | 0     | 1     | 1     | 0.31  |
| M.04.0.10           | 101           | 76        |            | X      | X        | 0                 | 0             | 0            | 1             | 0             | 0             | 0              | 1              | 0           | 2           | 0           | 1            | 0     | 1     | 2     | 1     | 0.44  |
| M.04.0.13           | 99            | 96        |            | X      |          | 0                 | 0             | 0            | 0             | 0             | 0             | 0              | 0              | 0           | 0           | 0           | 0            | 0     | 0     | 0     | 1     | 0.06  |
| M.04.0.29           | 114           |           |            | X      | X        | 0                 | 1             | 0            | 0             | 0             | 0             | 0              | 1              | 0           | 2           | 0           | 0            | 1     | 0     | 1     | 1     | 0.38  |
| M.04.0.37           | 279           | 75        |            | X      | X        | 1                 | 5             | 1            | 4             | 2             | 1             | 1              | 6              | 1           | 6           | 1           | 5            | 5     | 4     | 8     | 3     | 1.00  |
| M.04.1.4            | 214           | 26        |            | X      | X        | 0                 | 1             | 0            | 0             | 0             | 0             | 0              | 2              | 0           | 1           | 0           | 0            | 2     | 0     | 0     | 0     | 0.25  |
| M.05.0.1            | 133           |           |            | X      | X        | 0                 | 1             | 0            | 1             | 0             | 0             | 0              | 2              | 0           | 1           | 0           | 1            | 2     | 1     | 2     | 1     | 0.56  |
| M.05.0.25           | 153           |           |            | X      | X        | 0                 | 0             | 0            | 0             | 0             | 0             | 0              | 0              | 0           | 0           | 0           | 0            | 0     | 0     | 0     | 1     | 0.06  |
| M.05.0.30           | 344           | 41        |            | X      | X        | 2                 | 0             | 2            | 1             | 1             | 1             | 2              | 4              | 2           | 4           | 2           | 2            | 5     | 2     | 5     | 3     | 0.94  |
| M.05.0.43           | 131           |           |            | X      | X        | 1                 | 0             | 1            | 1             | 1             | 1             | 1              | 0              | 1           | 1           | 1           | 1            | 1     | 1     | 0     | 2     | 0.81  |
| M.05.1.5            | 93            | 67        |            | X      |          | 0                 | 0             | 0            | 0             | 0             | 0             | 0              | 0              | 0           | 0           | 0           | 0            | 0     | 0     | 0     | 0     | 0.00  |
| M.05.3.4            | 96            | 78        |            | X      |          | 0                 | 1             | 0            | 0             | 1             | 1             | 0              | 1              | 0           | 1           | 1           | 1            | 1     | 1     | 1     | 0     | 0.63  |
| M.06.0.8            | 219           | 38        |            | X      | X        | 0                 | 0             | 0            | 0             | 0             | 0             | 0              | 1              | 0           | 3           | 0           | 0            | 1     | 2     | 1     | 1     | 0.38  |
| M.06.2.4            | 154           | 98        |            | X      | X        | 0                 | 1             | 0            | 0             | 0             | 0             | 0              | 0              | 0           | 0           | 0           | 0            | 0     | 0     | 1     | 1     | 0.19  |
| susceptible         |               |           |            |        |          | 0.76              | 0.41          | 0.76         | 0.55          | 0.59          | 0.59          | 0.76           | 0.31           | 0.76        | 0.24        | 0.59        | 0.41         | 0.24  | 0.38  | 0.21  | 0.28  |       |
| <b>2000 strains</b> |               |           |            |        |          |                   |               |              |               |               |               |                |                |             |             |             |              |       |       |       |       |       |
| M.12.04             | 168           |           |            | X      | X        | 0                 | 0             | 0            | 0             | 0             | 0             | 0              | 1              | 0           | 2           | 0           | 0            | 1     | 0     | 1     | 1     | 0.31  |
| M.12.07             | 85            | 85        |            | X      |          | 0                 | 1             | 0            | 0             | 0             | 0             | 0              | 0              | 0           | 0           | 1           | 0            | 1     | 0     | 0     | 0     | 0.19  |
| M.12.37             | 116           |           |            | X      |          | 0                 | 3             | 0            | 0             | 1             | 1             | 0              | 2              | 0           | 1           | 1           | 1            | 2     | 2     | 3     | 1     | 0.69  |
| M.12.46             | 153           |           |            | X      | X        | 0                 | 0             | 0            | 0             | 0             | 0             | 0              | 2              | 0           | 0           | 0           | 0            | 1     | 0     | 2     | 1     | 0.25  |
| M.14.16             | 147           | 57        |            | X      |          | 0                 | 1             | 0            | 0             | 0             | 0             | 0              | 0              | 0           | 2           | 0           | 0            | 3     | 0     | 0     | 1     | 0.25  |
| M.14.17             | 146           | 39        |            | X      | X        | 2                 | 1             | 2            | 2             | 2             | 2             | 2              | 3              | 2           | 0           | 2           | 1            | 2     | 1     | 3     | 2     | 0.94  |
| M.14.25             | 113           | 109       |            | X      | X        | 2                 | 1             | 2            | 2             | 2             | 2             | 2              | 3              | 2           | 0           | 2           | 1            | 2     | 1     | 3     | 2     | 0.94  |
| M.14.34             | 143           | 38        |            | X      |          | 0                 | 0             | 0            | 0             | 0             | 0             | 0              | 1              | 0           | 2           | 0           | 0            | 1     | 1     | 1     | 1     | 0.38  |
| M.14.38             | 138           | 40        |            | X      | X        | 0                 | 1             | 0            | 0             | 0             | 0             | 0              | 0              | 0           | 1           | 0           | 0            | 0     | 0     | 1     | 1     | 0.25  |
| M.16.02             | 186           |           |            | X      |          | 0                 | 0             | 0            | 2             | 0             | 0             | 0              | 0              | 0           | 1           | 0           | 2            | 0     | 2     | 0     | 0     | 0.25  |
| M.16.04             | 139           |           |            | X      | X        | 0                 | 1             | 0            | 0             | 0             | 0             | 0              | 1              | 0           | 1           | 0           | 0            | 1     | 0     | 0     | 0     | 0.25  |
| M.16.12             | 111           | 34        |            | X      | X        | 0                 | 0             | 0            | 0             | 0             | 0             | 0              | 2              | 0           | 0           | 0           | 0            | 2     | 0     | 1     | 0     | 0.19  |
| M.16.13             | 110           | 53        |            | X      | X        | 0                 | 1             | 0            | 0             | 0             | 0             | 0              | 0              | 0           | 1           | 0           | 0            | 1     | 0     | 1     | 1     | 0.31  |
| M.16.22             | 111           | 52        |            | X      | X        | 0                 | 0             | 0            | 0             | 0             | 0             | 0              | 2              | 0           | 0           | 0           | 0            | 2     | 0     | 1     | 0     | 0.19  |
| M.16.23             | 113           | 59        |            | X      | X        | 0                 | 0             | 0            | 3             | 0             | 0             | 0              | 0              | 0           | 0           | 0           | 3            | 1     | 3     | 0     | 0     | 0.25  |
| M.16.27             | 164           | 71        |            | X      | X        | 0                 | 3             | 0            | 1             | 1             | 2             | 0              | 2              | 0           | 2           | 2           | 2            | 2     | 3     | 2     | 0     | 0.69  |
| M.16.30             | 137           | 19        |            | X      | X        | 0                 | 0             | 0            | 0             | 0             | 0             | 0              | 0              | 0           | 0           | 0           | 0            | 0     | 0     | 0     | 0     | 0.00  |
| M.16.40             | 159           |           |            | X      | X        | 0                 | 0             | 0            | 0             | 0             | 0             | 0              | 0              | 0           | 0           | 0           | 0            | 0     | 0     | 0     | 2     | 0.06  |
| M.16.43             | 179           |           |            | X      |          | 0                 | 2             | 0            | 0             | 1             | 0             | 1              | 4              | 0           | 1           | 1           | 0            | 3     | 1     | 2     | 1     | 0.63  |
| M.16.46             | 161           | 25        |            | X      | X        | 0                 | 3             | 0            | 0             | 1             | 2             | 0              | 2              | 0           | 2           | 2           | 1            | 1     | 2     | 2     | 0     | 0.63  |
| M.16.47             | 153           | 82        |            | X      |          | 0                 | 1             | 0            | 0             | 0             | 0             | 0              | 0              | 0           | 1           | 1           | 0            | 0     | 0     | 0     | 0     | 0.19  |
| susceptible         |               |           |            |        |          | 0.90              | 0.43          | 0.90         | 0.76          | 0.71          | 0.76          | 0.86           | 0.43           | 0.90        | 0.43        | 0.62        | 0.67         | 0.24  | 0.57  | 0.38  | 0.48  |       |

95

96
